# Supplementary material for: Rac1 GTPase in rodent kidneys is essential for salt-sensitive hypertension via a mineralocorticoid receptor–dependent pathway
Source: JCI journal article supplement (doi:10.1172/jci43124), 2011-07-18
Supplement: sd1 [file 1]

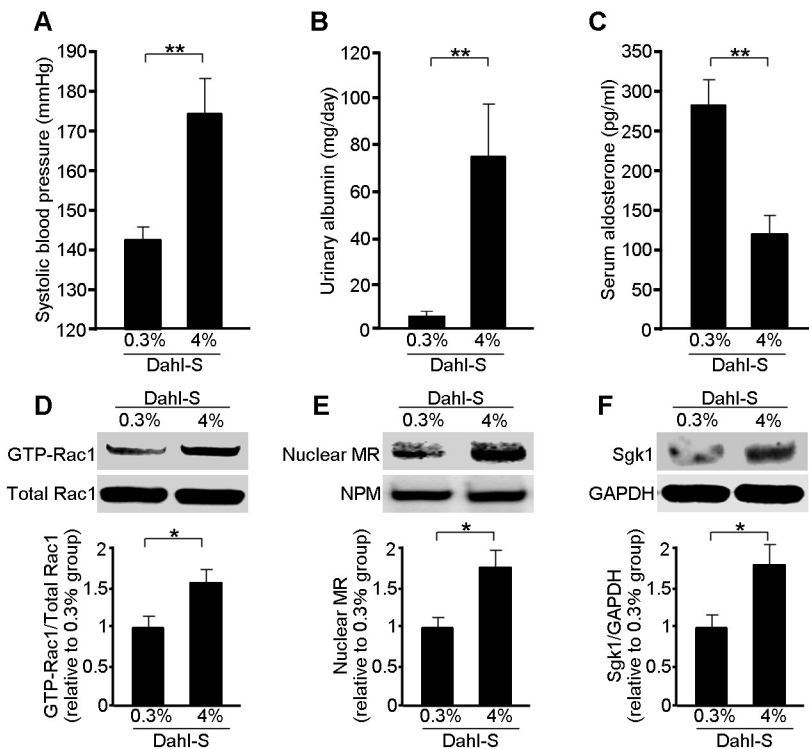

## Supplemental Figure 1

Effects of a 4%-salt diet on Rac1 activity and mineralocorticoid receptor (MR) signaling in Dahl salt-sensitive (Dahl-S) rats. (A-C) Systolic blood pressure (A), urinary albumin excretion (B), and serum aldosterone concentration (C) in Dahl-S rats fed a 0.3%- or 4%-salt diet for 4 weeks. (D) Expression of GTP-bound, active Rac1 (upper panel) and total Rac1 (lower panel) in the kidneys. Bar graphs show the results of densitometric analysis. (E) Nuclear expression of MR in the kidneys (upper panel). Nucleophosmin (NPM) served as loading control (lower panel). Bar graphs show the result of densitometric analysis. (F) Expression of Sgk1 (upper panel) and GAPDH (lower panel) in the kidneys. Bar graphs show the result of densitometric analysis. Data are expressed as means  $\pm$  SEM;  $n = 5$  each group. \*  $P < 0.05$ , \*\*  $P < 0.01$ .

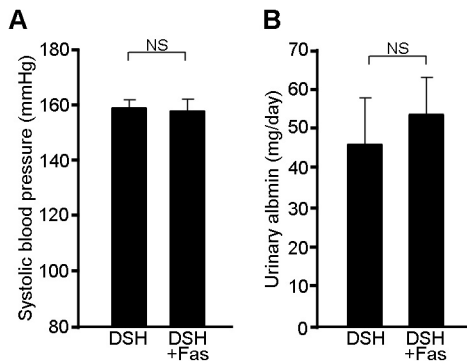

### Supplemental Figure 2

Effects of fasudil, a Rho-kinase inhibitor, on hypertension and albuminuria in Dahl-S rats. (**A** and **B**) Systolic blood pressure (**A**) and urinary albumin excretion (**B**) were measured in salt-loaded Dahl-S rats treated with fasudil (Fas). Data are expressed as means  $\pm$  SEM;  $n = 4$  or 5 each group.

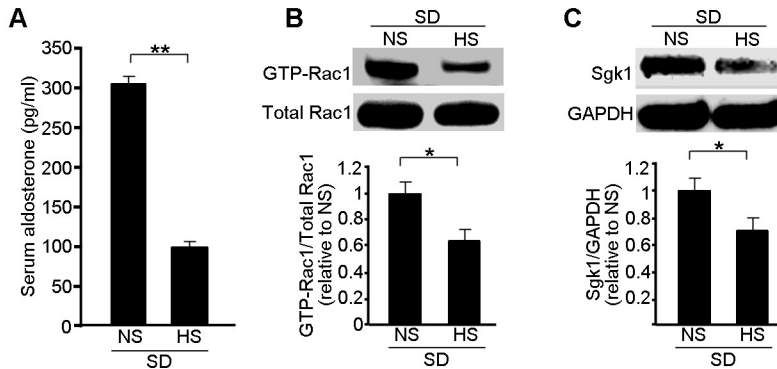

### Supplemental Figure 3

High salt diet alone does not cause Rac1 and Sgk1 induction in the kidneys of Sprague-Dawley (SD) rats. **(A)** Suppression of serum aldosterone in SD rats received an 8%-salt diet. **(B)** GTP-bound active Rac1 (upper panel) and total Rac1 (lower panel) in the kidneys. Bar graphs show the results of densitometric analysis. **(C)** Sgk1 (upper panel) and GAPDH (lower panel) expression in the kidneys. Bar graphs show the results of densitometric analysis. Data are expressed as means  $\pm$  SEM;  $n = 4$  each group. \* $P < 0.05$ , \*\* $P < 0.01$ .

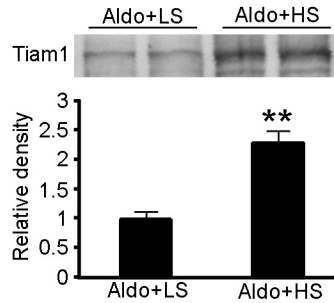

#### **Supplemental Figure 4**

Tiam1 activity evaluated by G15ARac1 pull-down assay in the kidneys of Aldo+LS or Aldo+HS. Bar graph shows the result of the densitometric analysis. Data are expressed as means  $\pm$  SEM;  $n = 4$  each group; \*\* $P < 0.01$ .
